# Supplementary material for: Measuring the Residual Levels of Fenpyroximate and Its Z-Isomer in Citrus Using Ultra-High-Performance Liquid Chromatography–Tandem Mass Spectrometry and Assessing the Related Dietary Intake Risks
Source: MDPI journal article supplement (doi:10.3390/molecules28207123), 2023-10-17
Supplement: s1 [file s1]

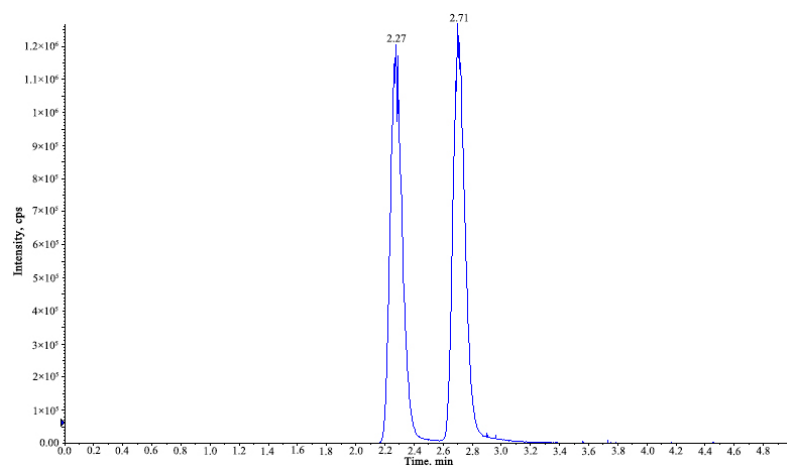

**Figure S1.** Total ion chromatogram of fenpyroximate and Z-fenpyroximate.

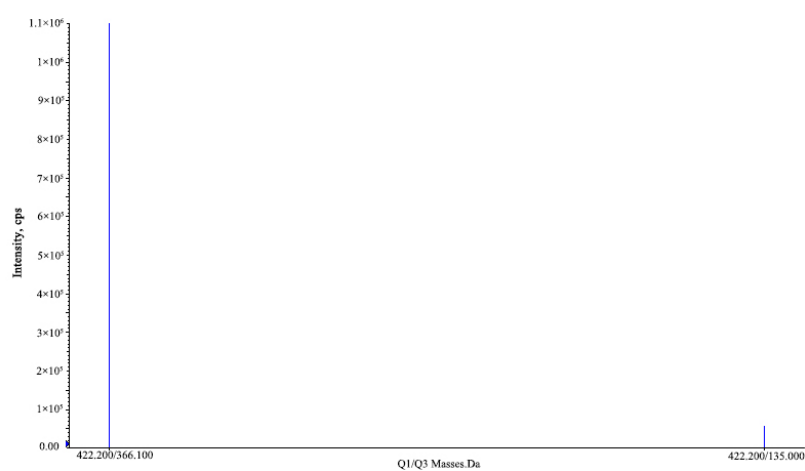

**Figure S2.** MS spectra of fenpyroximate and Z-fenpyroximate.

**Table S1.** Soil properties and climatic conditions of field experiment

| Location               | Soil properties |                           |                                   | Climatic conditions     |                          |
|------------------------|-----------------|---------------------------|-----------------------------------|-------------------------|--------------------------|
|                        | PH              | Organic matter content(%) | Cation exchange capacity(cmol/kg) | Average temperature(°C) | Total precipitation (mm) |
| Gansu                  | 7.00            | 2.55                      | 3.90                              | 16.6                    | 57.0                     |
| Zhejiang               | 7.51            | 2.31                      | 13.60                             | 15.0                    | 37.1                     |
| Zhangjiajie in Hunan   | 5.15            | 2.64                      | 20.40                             | 18.2                    | 25.7                     |
| Changsha in Hunan      | 5.90            | 2.50                      | 10.24                             | 26.5                    | 20.8                     |
| Hubei                  | 7.82            | 1.23                      | 12.00                             | 7.2                     | 0.0                      |
| Guangxi                | 4.50            | 3.79                      | 4.70                              | 13.4                    | 7.9                      |
| Chongqing              | 6.50            | 2.80                      | 16.30                             | 20.0                    | 0.0                      |
| Guizhou                | 5.10            | 9.22                      | 22.17                             | 11.8                    | 20.9                     |
| Yunnan                 | 5.00            | 2.26                      | 16.90                             | 12.9                    | 25.0                     |
| Guangzhou in Guangdong | 5.68            | 1.83                      | 14.91                             | 16.8                    | 0.0                      |
| Maoming in Guangdong   | 6.11            | 1.87                      | 11.67                             | 20.0                    | 0.0                      |
| Hainan                 | 4.72            | 2.21                      | 8.25                              | 22.2                    | 60.9                     |

**Table S2.** Quality control (QC) during actual sample test

| Matrix        | Compounds       | Detected date | Spiked Level (mg/kg) | Average recovery (n = 2)/% | RSD(%) |
|---------------|-----------------|---------------|----------------------|----------------------------|--------|
| Whole citrus  | Fenpyroximate   | 2023.6.17     | 0.1                  | 113                        | 2      |
|               | Z-fenpyroximate |               |                      | 99                         | 1      |
| Peeled citrus | Fenpyroximate   | 2023.6.19     | 0.1                  | 108                        | 3      |
|               | Z-fenpyroximate |               |                      | 97                         | 3      |

**Table S3.** Final residues of fenpyroximate, Z-fenpyroximate, and total residues in citrus.

| Field       | Pre<br>-Harvest<br>Interval<br>(Days) | Residues in whole citrus(mg kg <sup>-1</sup> ) |                     |                                            | Residues in flesh citrus(mg kg <sup>-1</sup> ) |                     |                                            |
|-------------|---------------------------------------|------------------------------------------------|---------------------|--------------------------------------------|------------------------------------------------|---------------------|--------------------------------------------|
|             |                                       | Fenpyroximate                                  | Z-<br>fenpyroximate | Total Residues<br>(Evaluate<br>Definition) | Fenpyroximate                                  | Z-<br>fenpyroximate | Total Residues<br>(Evaluate<br>Definition) |
| Gansu       | 15                                    | <0.010, <0.010                                 | <0.010, <0.010      | <0.020, <0.020                             | <0.010, <0.010                                 | <0.010,<0.010       | <0.020,<0.020                              |
|             | 25                                    | <0.010, <0.010                                 | <0.010, <0.010      | <0.020, <0.020                             | <0.010, <0.010                                 | <0.010,<0.010       | <0.020,<0.020                              |
| Zhejiang    | 15                                    | 0.15, 0.18                                     | <0.010, <0.010      | 0.16, 0.19                                 | <0.010, <0.010                                 | <0.010,<0.010       | <0.020,<0.020                              |
|             | 25                                    | 0.11, 0.054                                    | <0.010, <0.010      | 0.12, 0.064                                | <0.010, <0.010                                 | <0.010,<0.010       | <0.020,<0.020                              |
| Zhangjiajie | 15                                    | 0.15, 0.15                                     | <0.010, <0.010      | 0.16, 0.16                                 | <0.010, <0.010                                 | <0.010,<0.010       | <0.020,<0.020                              |
|             | 25                                    | 0.12, 0.12                                     | <0.010, <0.010      | 0.13, 0.13                                 | <0.010, <0.010                                 | <0.010,<0.010       | <0.020,<0.020                              |
| Changsha    | 15                                    | 0.034,0.035                                    | <0.010, <0.010      | 0.044, 0.045                               | 0.012, 0.012                                   | <0.010,<0.010       | 0.022, 0.022                               |
|             | 25                                    | 0.032, 0.018                                   | <0.010, <0.010      | 0.042, 0.028                               | 0.018, 0.019                                   | <0.010,<0.010       | 0.028, 0.029                               |
| Hubei       | 15                                    | 0.13, 0.13                                     | <0.010, <0.010      | 0.14, 0.14                                 | 0.047, 0.045                                   | <0.010,<0.010       | 0.057, 0.055                               |
|             | 25                                    | 0.11, 0.10                                     | <0.010, <0.010      | 0.12, 0.11                                 | 0.040, 0.030                                   | <0.010,<0.010       | 0.050, 0.040                               |
| Guangxi     | 15                                    | 0.039, 0.043                                   | <0.010, <0.010      | 0.049, 0.053                               | <0.010, <0.010                                 | <0.010,<0.010       | <0.020,<0.020                              |
|             | 25                                    | 0.050, 0.056                                   | <0.010, <0.010      | 0.060, 0.066                               | <0.010, <0.010                                 | <0.010,<0.010       | <0.020,<0.020                              |
| Chongqing   | 15                                    | 0.18, 0.13                                     | <0.010, <0.010      | 0.19, 0.14                                 | <0.010, <0.010                                 | <0.010,<0.010       | <0.020,<0.020                              |
|             | 25                                    | 0.072, 0.14                                    | <0.010, <0.010      | 0.082, 0.15                                | <0.010, <0.010                                 | <0.010,<0.010       | <0.020,<0.020                              |
| Guizhou     | 15                                    | 0.17, 0.094                                    | <0.010, <0.010      | 0.18, 0.10                                 | 0.063, 0.063                                   | <0.010,<0.010       | 0.073, 0.073                               |
|             | 25                                    | 0.17, 0.094                                    | <0.010, <0.010      | 0.18, 0.10                                 | 0.041, 0.030                                   | <0.010,<0.010       | 0.051, 0.040                               |
| Yunnan      | 15                                    | 0.085, 0.097                                   | <0.010, <0.010      | 0.095, 0.11                                | 0.021, 0.022                                   | <0.010,<0.010       | 0.031, 0.032                               |
|             | 25                                    | 0.14, 0.13                                     | <0.010, <0.010      | 0.15, 0.14                                 | <0.010, <0.010                                 | <0.010,<0.010       | <0.020,<0.020                              |
| Guangzhou   | 15                                    | 0.015, 0.016                                   | <0.010, <0.010      | 0.025, 0.026                               | <0.010, <0.010                                 | <0.010,<0.010       | <0.020,<0.020                              |
|             | 25                                    | <0.010, <0.010                                 | <0.010, <0.010      | <0.020, <0.020                             | <0.010, <0.010                                 | <0.010,<0.010       | <0.020,<0.020                              |

|         |    |              |                |              |                |               |               |
|---------|----|--------------|----------------|--------------|----------------|---------------|---------------|
| Maoming | 15 | 0.024, 0.029 | <0.010, <0.010 | 0.034, 0.039 | <0.010, <0.010 | <0.010,<0.010 | <0.020,<0.020 |
|         | 25 | 0.026, 0.032 | <0.010, <0.010 | 0.036, 0.042 | <0.010, <0.010 | <0.010,<0.010 | <0.020,<0.020 |
| Hainan  | 15 | 0.062, 0.084 | <0.010, <0.010 | 0.072, 0.094 | <0.010, <0.010 | <0.010,<0.010 | <0.020,<0.020 |
|         | 25 | 0.080, 0.028 | <0.010, <0.010 | 0.090, 0.038 | 0.011, 0.012   | <0.010,<0.010 | 0.021, 0.022  |
